# Supplementary material for: Predictors of virological outcomes after analytical interruption of antiretroviral therapy following immune interventions with HTI vaccines in early-treated people with HIV: a pooled analysis from the AELIX-002 and AELIX-003 clinical trials
Source: Research Square preprint supplement (doi:10.21203/rs.3.rs-6567488/v1), 2025-07-23
Supplement: Supplementary file 1 [file 6815062d1869d2384255dc92.docx]

**Supplementary Material for** Predictors of virological outcomes after analytical interruption of antiretroviral therapy following immune interventions with HTI vaccines in early-treated people with HIV: a pooled analysis from the AELIX-002 and AELIX-003 clinical trials

**Supplementary Fig. 1 | AELIX-002 and AELIX-003 trial designs and HIV-1 RNA pVL during the ATI period**

**Supplementary Table 1 | AELIX-002 and AELIX-003 study populations**

**Supplementary Table 2 | Clinical, virological and immunological correlates of ATI outcomes**

**Supplementary Table 3 | Univariate correlate analysis for time off ART**

**Supplementary Table 4 | Multivariate logistic regression analysis for time off ART**

**Supplementary Data S1 | List of AELIX-002 and AELIX-003 Study Group members**

## **Supplementary Fig. 1 | AELIX-002 and AELIX-003 trial designs and HIV-1 RNA pVL during the ATI period. a**, **b**, AELIX-002 and AELIX-003 trial schedule and study visits. **c, d,** AELIX-002 and AELIX-003 individual HIV-1 pVL during the 24 weeks of ATI, shown for all placebo (blue) or vaccine (red) recipients.

**
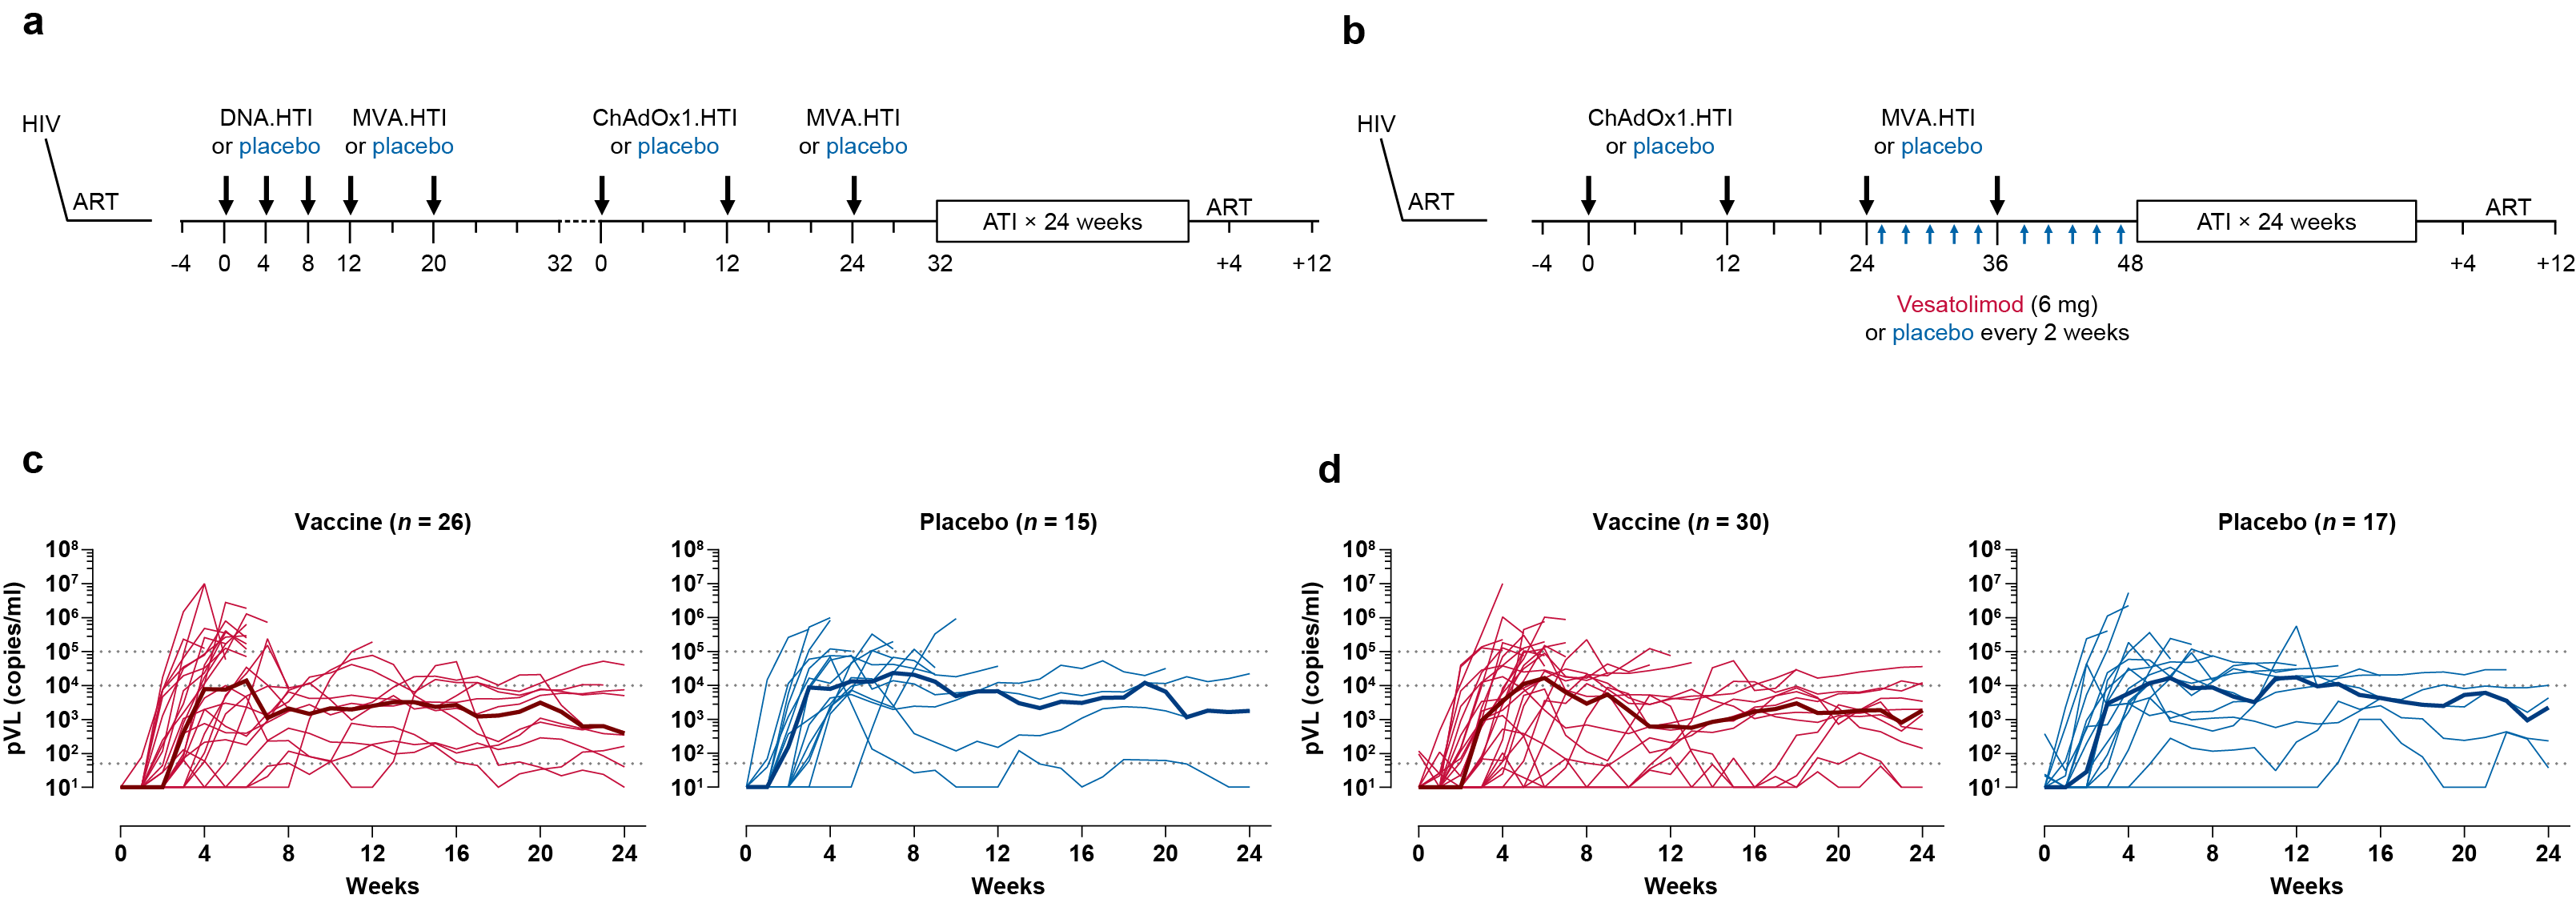
**

## **Supplementary Table 1 | AELIX-002 and AELIX-003 study populations**

Main demographic and clinical characteristics of individuals included in this analysis; All participants reflect the merged AELIX-002 and AELIX-003 vaccinees and placebo recipient populationsMedian (IQR) is presented, except when it is specified differentially. Mann–Whitney test and chi-squared test used.

| Characteristics | All participants  (*n* = 88) | AELIX-002 (*n* = 41) | AELIX-003 (*n* = 47) | *P* value |
| --- | --- | --- | --- | --- |
| At study entry |  |  |  |  |
| Treatment allocation, vaccine, *n (%)* | 59 (67%) | 26 (63%) | 33 (70%) | 0.6498 |
| Age, years | 38 (34–43) | 36 (33–41) | 39 (31–47) | 0.5410 |
| Sex at birth, male, *n* (%) | 87 (99%) | 87 (99%) | 47 (100%) | 0.4659 |
| Days from estimated HIV acquisition to ART initiation | 65 (30–91) | 65 (31–85) | 65 (28–95) | 0.6190 |
| Fiebig stage at ART initiation, *n* (%)a |  |  |  | 0.2373 |
| Eclipse | 0 (0.0%) | 0 (0.0%) | 0 (0.0%) |  |
| I | 4 (5%) | 2 (5%) | 2 (4%) |  |
| II | 5 (6%) | 1 (2%) | 3 (6%) |  |
| III | 5 (6%) | 2 (5%) | 3 (6%) |  |
| IV | 7 (8%) | 2 (5%) | 5 (11%) |  |
| V | 39 (44%) | 22 (54%) | 17 (36%) |  |
| VI | 23 (26%) | 12 (29%) | 11 (23%) |  |
| Missing | 5 (6%) | 0 (0%) | 5 (11%) |  |
| HIV-1 pVL at ART initiation  (log10 copies/ml) | 5.0 (4.4–6.0) | 4.8 (4.4–5.3) | 5.3 (4.4–6.2) | 0.0640 |
| Time on ART at study entry, months | 35 (23–50) | 28 (19–39) | 44 (31–55) | <0.0010 |
| INSTI-based ART at study entry, *n (%)* | 74 (84%) | 41 (100%) | 33 (70%) | <0.0001 |
| Beneficial HLA alleles, anyb | 18 (20%) | 9 (22%) | 9 (19%) | 0.9400 |
| At ATI start |  |  |  |  |
| Absolute CD4 (cells/mm3) | 863 (697–1,130) | 860 (733–1,114) | 906 (649–1,175) | 0.7660 |
| Time on ART, months | 52 (42–64) | 49 (42–58) | 55 (44–67) | 0.3300 |
| Total proviral HIV-1 DNA (copies/106 CD4+ T cells) | 113 (49–294) | 90 (40–261) | 159 (50–437) | 0.1090 |
| Intact proviral HIV-1 DNA (copies/106 CD4+ T cells) | 29 (8–90) | 14 (3–42) | 58 (13–142) | 0.0030 |
| HTI magnitude  (SFC/106 PBMC) | 445 (125–995) | 325 (105–840) | 746 (204–1,210) | 0.0650 |

aAccording to Fiebig, AIDS 2003. bBeneficial HLA class I alleles associated with spontaneous viral control (B*27:05, B*57:01, B*15:17, B*15:03, B*58:01).

## **Supplementary Table 2 | Clinical, virological and immunological correlates of ATI outcomes.** Spearman’s ρ and *P* value are shown for each correlation between baseline characteristics, viral reservoir, immune parameters and ATI outcomes by active and placebo groups, and when considering pooled data for all participants in AELIX-002 and AELIX-003. All tests are two-sided, unadjusted for multiple comparisons, with 5% error rate. *P* values < 0.05 are highlighted.

|  | **Placebo; *N* = 32** | | | | **Active; *N* = 56** | | | | **Pooled; *N* = 88** | | | |
| --- | --- | --- | --- | --- | --- | --- | --- | --- | --- | --- | --- | --- |
|  | **Time to pVL >50** | **Time to pVL >10K** | **Time off ART** | **pVL at end of ATI** | **Time to pVL >50** | **Time to pVL >10K** | **Time off ART** | **pVL at end of ATI** | **Time to pVL >50** | **Time to pVL >10K** | **Time off ART** | **pVL at end of ATI** |
| **Baseline characteristics** | | | | | | | | | | | | |
| Age | ρ = 0.06  *P =* 0.730 | ρ = 0.03  *P =* 0.871 | ρ = 0.09  *P =* 0.641 | ρ = 0.03  *P =* 0.856 | ρ = 0.20  *P =* 0.143 | ρ = 0.18  *P =* 0.178 | ρ = 0.08  *P =* 0.580 | ρ = 0.05  *P =* 0.703 | ρ = 0.18  *P =* 0.094 | ρ = 0.15  *P =* 0.171 | ρ = 0.08  *P =*0.469 | ρ = 0.01  *P =* 0.899 |
| Absolute CD4+ T cells | ρ = 0.28  *P =*0.127 | ρ = 0.25  *P =* 0.167 | ρ = 0.10  *P =* 0.599 | ρ = 0.07  *P =* 0.719 | ρ = 0.00  *P =* 0.995 | ρ = 0.16  *P =* 0.230 | ρ = 0.23  *P =* 0.091 | ρ =–0.22  *P =*0.103 | ρ =0.07  *P =* 0.542 | ρ = 0.17  *P =* 0.124 | ρ = 0.18  *P =* 0.098 | ρ = –0.13  *P =* 0.237 |
| CD4/CD8 | ρ = 0.33  *P =* 0.064 | ρ = 0.16  *P =* 0.390 | ρ = 0.14  *P =* 0.448 | ρ = –0.12  *P =* 0.532 | ρ = 0.06  *P =* 0.658 | ρ = 0.16  *P =* 0.235 | ρ = 0.19  *P =* 0.166 | ρ = –0.25  *P =* 0.062 | ρ = 0.14  *P* = 0.188 | ρ = 0.14  *P* = 0.180 | ρ = 0.18  *P* = 0.095 | ρ = –0.21  *P* = 0.057 |
| Pre-ART pVL | ρ = –0.23  *P* = 0.209 | ρ = –0.26  *P* = 0.143 | ρ = –0.22  *P* = 0.222 | ρ = 0.11  *P* = 0.548 | ρ = –0.44  *P* = **0.001** | ρ = –0.44  *P* = **0.001** | ρ = –0.33  *P* = **0.012** | ρ = 0.35  *P* = **0.010** | ρ = –0.34  *P* = **0.001** | ρ = –0.36  *P* < **0.001** | ρ = –0.31  *P* = **0.004** | ρ = 0.27  *P* = **0.011** |
| Days from HIV to ART | ρ = 0.12  *P* = 0.515 | ρ = 0.16  *P* = 0.371 | ρ = 0.26  *P* = 0.154 | ρ = –0.24  *P* = 0.202 | ρ = 0.21  *P* = 0.128 | ρ = 0.04  *P* = 0.765 | ρ = –0.06  *P* = 0.635 | ρ = 0.06  *P* = 0.654 | ρ = 0.13  *P* = 0.241 | ρ = 0.08  *P* = 0.483 | ρ = 0.05  *P* = 0.632 | ρ = –0.03  *P* = 0.752 |
| Time on ART | ρ = 0.18  *P* = 0.321 | ρ = 0.06  *P* = 0.765 | ρ = 0.12  *P* = 0.521 | ρ = –0.18  *P* = 0.345 | ρ = 0.32  *P* = **0.016** | ρ = 0.32  *P* = **0.017** | ρ = 0.29  *P* = **0.029** | ρ = –0.29  *P* = **0.032** | ρ = 0.29  *P* = **0.005** | ρ = 0.23  *P* = **0.031** | ρ = 0.22  *P* = **0.040** | ρ = –0.25  *P* = **0.019** |
| **Viral reservoir** | | | | | | | | | | | | |
| Total proviral HIV-1 DNA at study entry | ρ = –0.19  *P* = 0.289 | ρ = –0.47  *P* = **0.007** | ρ = –0.54  *P* = **0.002** | ρ = 0.35  *P* = 0.053 | ρ = –0.05  *P* = 0.698 | ρ = –0.26  *P* = 0.057 | ρ = –0.14  *P* = 0.304 | ρ = 0.23  *P* = 0.096 | ρ = –0.09  *P* = 0.411 | ρ = –0.34  *P* = **0.001** | ρ = –0.29  *P* = **0.006** | ρ = 0.27  *P =* **0.014** |
| Intact proviral HIV-1 DNA at study entry | ρ = –0.01  *P =* 0.948 | ρ = –0.47  *P =* **0.029** | ρ = –0.64  *P =* **0.001** | ρ = 0.53  *P =* **0.013** | ρ = –0.19  *P =* 0.182 | ρ = –0.36  *P =* **0.011** | ρ = –0.21  *P =* 0.136 | ρ = 0.38  *P =* **0.008** | ρ = –0.12  *P =* 0.304 | ρ = –0.40  *P =* **0.001** | ρ = –0.35  *P =* **0.002** | ρ = 0.39  *P =* **0.001** |
| Total proviral HIV-1 DNA at ATI start | ρ = –0.10  *P =* 0.594 | ρ = –0.07  *P =* 0.721 | ρ = –0.10  *P =* 0.573 | ρ = 0.14  *P =* 0.459 | ρ = –0.09  *P =* 0.524 | ρ = –0.30  *P =* **0.025** | ρ = –0.18  *P =* 0.184 | ρ = 0.22  *P =* 0.100 | ρ = –0.08  *P =* 0.463 | ρ = –0.21  *P =* **0.045** | ρ = –0.15  *P =* 0.171 | ρ = 0.19  *P =* 0.088 |
| Intact proviral HIV-1 DNA at ATI start | ρ = 0.00  *P =* 0.996 | ρ = –0.39  *P =* 0.072 | ρ = –0.50  *P =* **0.017** | ρ = 0.45  *P =* **0.041** | ρ = –0.15  *P =* 0.287 | ρ = –0.33  *P =* **0.017** | ρ = –0.22  *P =* 0.122 | ρ = 0.27  *P =* 0.057 | ρ = –0.09  *P =* 0.429 | ρ = –0.35  *P =* **0.003** | ρ = –0.31  *P =* **0.007** | ρ = 0.30  *P =* **0.010** |
| **HTI immune parameters** | | | | | | | | | | | | |
| Magnitude HTI at study entry | ρ = –0.14 *P =* 0.479 | ρ = –0.14  *P =* 0.475 | ρ = 0.09  *P =* 0.647 | ρ = –0.22  *P =* 0.267 | ρ = 0.41  *P =* **0.002** | ρ = 0.26  *P =* 0.065 | ρ = 0.27  *P =* 0.053 | ρ = –0.23  *P =* 0.106 | ρ = 0.26  *P =* 0.020 | ρ = 0.15  *P =* 0.190 | ρ = 0.22  *P =* 0.051 | ρ = –0.22  *P =* 0.054 |
| Focus HTI at study entry | ρ = –0.24  *P =* 0.227 | ρ = –0.10  *P =* 0.603 | ρ = 0.17  *P =* 0.401 | ρ = –0.22  *P =* 0.275 | ρ = 0.38  *P =* **0.005** | ρ = 0.14  *P =* 0.330 | ρ = 0.11  *P =* 0.422 | ρ = –0.10  *P =* 0.463 | ρ = 0.19  *P =* 0.083 | ρ = 0.08  *P =* 0.460 | ρ = 0.14  *P =* 0.211 | ρ = –0.14  *P =* 0.227 |
| Breadth HTI at study entry | ρ = –0.16  *P =* 0.399 | ρ = –0.02  *P =* 0.938 | ρ = 0.06  *P =* 0.756 | ρ = –0.12  *P =* 0.549 | ρ = 0.21  *P =* 0.138 | ρ = 0.03  *P =* 0.810 | ρ = 0.10  *P =* 0.461 | ρ = –0.08  *P =* 0.571 | ρ = 0.03  *P =* 0.799 | ρ = –0.01  *P =* 0.907 | ρ = 0.06  *P =* 0.574 | ρ = –0.06  *P =* 0.598 |
| Magnitude HTI at ATI start | ρ = –0.06  *P =* 0.757 | ρ = 0.00  *P =* 0.983 | ρ = 0.10  *P =* 0.585 | ρ = –0.09  *P =* 0.649 | ρ = 0.40  *P =* **0.004** | ρ = 0.44  *P =* **0.001** | ρ = 0.46  *P =* **0.001** | ρ = –0.33  *P =* **0.018** | ρ = 0.35  *P =* **0.001** | ρ = 0.32  *P =* **0.003** | ρ = 0.32  *P =* **0.003** | ρ = –0.27  *P =* **0.015** |
| Focus HTI at ATI start | ρ = –0.13  *P =* 0.508 | ρ = 0.00  *P =* 0.988 | ρ = 0.02  *P =* 0.921 | ρ = 0.10  *P =* 0.596 | ρ = –0.09  *P =* 0.509 | ρ = 0.12  *P =* 0.378 | ρ = 0.15  *P =* 0.283 | ρ = –0.02  *P =* 0.915 | ρ = 0.07  *P =* 0.534 | ρ = 0.14  *P =* 0.206 | ρ = 0.10  *P =* 0.375 | ρ = –0.02  *P =* 0.842 |
| Breadth HTI at ATI start | ρ = –0.10  *P =* 0.590 | ρ = 0.01  *P =* 0.972 | ρ = 0.15  *P =* 0.420 | ρ = –0.15  *P =* 0.421 | ρ = 0.37  *P =* **0.007** | ρ = 0.23  *P =* 0.104 | ρ = 0.19  *P =* 0.168 | ρ = –0.23  *P =* 0.105 | ρ = 0.31  *P =* **0.005** | ρ = 0.22  *P =* **0.042** | ρ = 0.21  *P =* 0.052 | ρ = –0.23  *P =* **0.041** |
| Cumulative breadth HTI at ATI start | ρ = –0.06  *P =* 0.765 | ρ = 0.12  *P =* 0.514 | ρ = 0.43  *P =* **0.016** | ρ = –0.35  *P =* 0.058 | ρ = 0.25  *P =* 0.067 | ρ = 0.17  *P =* 0.213 | ρ = 0.25  *P =* 0.070 | ρ = –0.29  *P =* **0.037** | ρ = 0.22  *P =* **0.040** | ρ = 0.23  *P =* **0.038** | ρ = 0.29  *P =* **0.008** | ρ = –0.31  *P =* **0.004** |
| Peak magnitude HTI | ρ = –0.10  *P =* 0.592 | ρ = 0.07  *P =* 0.717 | ρ = 0.30  *P =* 0.101 | ρ = –0.20  *P =* 0.280 | ρ = 0.33  *P =* **0.016** | ρ = 0.36  *P =* **0.007** | ρ = 0.38  *P =* **0.004** | ρ = –0.29  *P =* **0.032** | ρ = 0.27  *P =* **0.012** | ρ = 0.28  *P =* **0.009** | ρ = 0.30  *P =* **0.005** | ρ = –0.27  *P =* **0.012** |
| Increase from baseline in magnitude HTI at peak | ρ = –0.08  *P =* 0.685 | ρ = 0.06  *P =* 0.739 | ρ = 0.29  *P =* 0.124 | ρ = –0.19  *P =* 0.332 | ρ = 0.22  *P =* 0.121 | ρ = 0.28  *P =* **0.041** | ρ = 0.30  *P =* **0.031** | ρ = –0.26  *P =* 0.063 | ρ = 0.23  *P =* **0.034** | ρ = 0.24  *P =* **0.032** | ρ = 0.25  *P =* **0.024** | ρ = –0.24  *P* = **0.032** |

## **Supplementary Table 3 | Univariate correlate analysis for time off ART.** Univariate logistic regression models for time to ART resumption >12 weeks in all participants (vaccine and placebo recipients) from AELIX-002 and AELIX-003 trials who entered the ATI phase (*n* = 88). Odds ratio (OR) and 95% confidence interval (CI) and *P* values are shown. In parentheses, for each variable, the unit of increment is shown for interpretation of the odds ratio. Univariate analyses were not adjusted for multiple comparisons.

| Variable | OR (95% CI) | *P* value |
| --- | --- | --- |
| Treatment allocation  (active vs placebo arm) | 1.02 (0.42–2.49) | 0.9673 |
| Age at study entry (1 year) | 1.02 (0.97–1.06) | 0.5212 |
| CD4 T cells/mm3 at study entry (100 cells/mm3) | 1.10 (0.96–1.28) | 0.1759 |
| Ratio CD4/CD8 at study entry  (0.2 units) | 1.16 (0.97–1.42) | 0.1253 |
| HIV-1 pVL at ART initiation (1 log10 copies/ml) | 0.61 (0.39–0.91) | 0.0187 |
| Days from estimated HIV acquisition to ART (7 days) | 1.01 (0.94–1.09) | 0.7090 |
| Months on ART at study entry (1 month) | 1.02 (1.00–1.04) | 0.1293 |
| Total proviral HIV DNA at study entry  (100 copies/106 CD4 T cells) | 0.78 (0.62–0.93) | 0.0185 |
| Intact proviral HIV DNA at study entry  (50 copies/106 CD4 T cells) | 0.80 (0.58–0.97) | 0.0898 |
| Total proviral HIV DNA at ATI start  (100 copies/106 CD4 T cells) | 0.84 (0.67–0.98) | 0.0636 |
| Intact proviral HIV DNA at ATI start  (50 copies/106 CD4 T cells) | 0.72 (0.47–0.96) | 0.0747 |
| Magnitude HTI at study entry  (100 SFC/106 PBMC) | 1.12 (1.04–1.45) | 0.0230 |
| Focus HTI at study entry  (10 % HTI/total HIV) | 1.05 (0.88–1.24) | 0.5997 |
| Breadth HTI at study entry (1 unit) | 1.19 (0.91–1.58) | 0.2147 |
| Magnitude HTI at ATI start  (100 SFC/106 PBMC) | 1.10 (1.03–1.20) | 0.0042 |
| Focus HTI at ATI start  (10 % HTI/total HIV) | 1.03 (0.89–1.21) | 0.6628 |
| Breadth HTI at ATI start (1 unit) | 1.28 (1.03–1.62) | 0.0325 |
| Cumulative breadth HTI at ATI start (1 unit) | 1.23 (1.04–1.47) | 0.0225 |
| Peak magnitude HTI (100 SFC/106 PBMC) | 1.05 (1.01–1.10) | 0.0245 |
| Increase magnitude HTI at peak  (100 SFC/106 PBMC) | 1.04 (0.99–1.09) | 0.1000 |

## **Supplementary Table 4 | Multivariate logistic regression analysis for time off ART.** Multivariate logistic regression model for resuming ART >12 weeks considering covariates in all participants from AELIX-002 and AELIX-003 trials who entered the ATI phase (*n* = 88). Odds ratio (OR) and 95% confidence interval (CI) and *P* values are shown. In parentheses, for each variable, the unit of increment is shown for interpretation of the OR.

|  | **Full model** | | **Final model** | |
| --- | --- | --- | --- | --- |
|  | **OR (95% CI)** | ***P* value** | **OR (95% CI)** | ***P* value** |
| Total proviral HIV DNA at ATI start (100 copies/106 CD4 T cells) | 0.78 (0.59–0.96) | 0.0462 | 0.79 (0.62–0.95) | 0.0316 |
| Magnitude HTI at ATI start (100 SFC/106 PBMC) | 1.18 (0.99–1.45) | 0.0872 | 1.13 (1.05–1.23) | 0.0020 |
| pVL at ART initiation  (1 log10 copies/ml) | 0.67 (0.39–1.08) | 0.1166 |  |  |
| Months on ART at study entry  (1 month) | 1.02 (0.99–1.05) | 0.1631 |  |  |

## **Supplementary Data S1 | List of AELIX-002 and AELIX-003 Study Group members**

**AELIX-002 Study Group members**

**From Fundació Lluita contra les Infeccions, Deaprtment of Infectious Diseases, Hospital Universitari Germans Trias i Pujol, Badalona, Spain:** Yovaninna Alarcón-Soto, Lucía Bailón, Susana Benet, Patricia Cobarsí, Roser Escrig, Silvia Gel, Cora Loste, Miriam López, Cristina Martinez, Laura Mas, Cristina Miranda, José Moltó, Jose Muñoz, Aroa Nieto, Helena Pera, Francisco Perez, Jordi Puig, Lara Teruel, Albert Tuldrà and Jessica Toro.

**From IrsiCaixa, Hospital Universitari Germans Trias i Pujol, Badalona, Spain:** Christian Brander, Maria Casadellà, Samandhy Cedeño, Bonaventura Clotet, Josep Coll, Tuixent Escribà, Anuska Llano, Mireia Manent, Chiara Mancuso, Beatriz Mothe, Marc Noguera-Julian, Roger Paredes, Mariona Parera, Miriam Rosás-Umbert, Marta Ruiz-Riol and Bruna Oriol-Tordera.

**From Projecte dels Noms-Hispanosida, BCN Checkpoint, Barcelona, Spain:** Javier Fernández, Michael Meulbroek, Félix Perez, Ferran Pujol, Angel Rivero and Jorge Saz.

**From AELIX Therapeutics S.L., Barcelona, Spain:** Lance Berman, Jose Luís Cabero, Margarida Garcia, Anne R. Leselbaum, Marc Mansour, Ian McGowan and Jordi Naval.

**From the Jenner Institute, The Nuffield Department of Medicine, University of Oxford, UK**: Tomáš Hanke and Edmund G. Wee.

**From Gilead Sciences, Foster City, US:** Devi SenGupta and Romas Geleziunas.

**From Germans Trias i Pujol Research Institute, Badalona, Spain**: Ana María Barriocanal

**AELIX-003 Study Group members**

**From Fundació Lluita contra les Infeccions, Department of Infectious Diseases, Hospital Universitari Germans Trias i Pujol, Badalona, Spain**: Yovaninna Alarcón-Soto, Lucia Bailón, Susana Benet, Patricia Cobarsí, Cristina Martinez, José Moltó, Aroa Nieto, Francisco Perez and Jordi Puig.

**From IrsiCaixa, Hospital Universitari Germans Trias i Pujol, Badalona, Spain:** Christian Brander, Samandhy Cedeño, Bonaventura Clotet, Eulalia Grau, Anuska Llano, Beatriz Mothe and Roger Paredes.

**From AELIX Therapeutics S.L., Barcelona, Spain**: Alvaro Aranguen, Jose Luís Cabero, Margarida Garcia-Garcia, Isabel Leal, Ian McGowan and Jordi Naval.

**From Gilead Sciences, Foster City, CA, USA:** Yanhui Cai, Romas Geleziunas, Susan Guo, Devi SenGupta, Elena Vendrame and Jeffrey J. Wallin

**From Hospital Universitari Vall d´Hebron, Barcelona, Spain:** Adrian Curran, Vicenç Falcó, Jordi Navarro, Bibiana Planas, Paula Suanzes, Joaquin Burgos, María José Buzón, Meritxell Genescà and Judith Grau.

**From Hospital Universitario La Paz, Madrid, Spain:** Jose Ramón Arribas, Alberto Borobia, Carmen Busca, Julen Cadiñanos, Juan González García, Victor Hontañon, Javier Queiruga, Rafael Mican and Enrique Seco.

**From Hospital General Universitario Gregorio Marañón, Madrid, Spain:** Juan Berenguer, Cristina Diez, Juan Carlos Lopez Bernaldo de Quirós, Paloma Gijón, Leire Pérez-Latorre and Margarita Ramirez.

**From Hospital Universitario La Princesa, Madrid, Spain:** Lucio Jesús García-Fraile, Samuel Martín Vílchez, Gina Mejía-Abril, Alejandro de Miguel Cáceres, Ignacio de los Santos, José María Serra and Tamara De la Torre Muñoz.

**From Hospital Clinic de Barcelona, Barcelona, Spain:** Juan Ambrosioni, Eva Ariza and Jose Maria Miró.

**From Hospital Universitari de Belltvige, Barcelona, Spain:** Anna Ferrer,Benito Garcia, Arkaitz Imaz, Sandra Morenilla, Jordi Niubó, Camila Piatti, Sofía Scévola, Irene Soriano and Daniel Vázquez.

**From Hospital Universitari Ramón y Cajal, Madrid, Spain:** Santiago Moreno.

**From Hospital Santa Creu i Sant Pau, Barcelona, Spain:** Pere Domingo.
